# Supplementary material
Source: PubMed Central journal article supplement (PMC7796968)
Supplement: NIHMS1645488-supplement-Supplementary___Appendix__online_only_material__etc__.pdf [file NIHMS1645488-supplement-Supplementary___Appendix__online_only_material__etc__.pdf]

## **Supplemental Table Legends**

Table S1. Single gene disorders causing hydrops: Gene included if 2 or more molecularly and phenotypically confirmed cases in the literature. Genes marked with an asterisk (\*) have only 1 case in the literature, but included due to phenotypic series association with another gene on this list.

Table S2. Single Gene Disorders with Emerging Evidence suggests could cause hydrops: Genes included if there is exactly one case in the literature with hydrops and a molecularly confirmed genetic variant.

Table S3. Single Gene Disorders with Limited Evidence to suggest they could cause Hydrops: Genes with variants identified in hydropic fetuses where the genetic variant's significance is uncertain, alternative genetic variants may explain the hydrops in the reported case, or the gene is not definitively associated with human disease (candidate gene).

Table S4. Phenotypic series completion of known hydrops disorders or clinical diagnosis of hydrops: Genes suspected in cases of hydrops but without molecular evidence for their involvement. This includes cases with clinical suspicion for a specific disorder without molecular confirmation, genes discussed in the literature as associated with hydrops where no specific primary hydropic case could be found in the literature, and genes with variants not yet reported in hydropic fetuses but where a different gene causing the syndrome has been seen in multiple hydropic fetuses.
